# Supplementary material for: The Dynamics of Single-Cell Nanomotion Behaviour of Saccharomyces cerevisiae in a Microfluidic Chip for Rapid Antifungal Susceptibility Testing
Source: MDPI journal article supplement (doi:10.3390/fermentation8050195), 2022-04-26
Supplement: s1 [file s1]

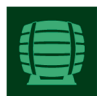

Supplementary data

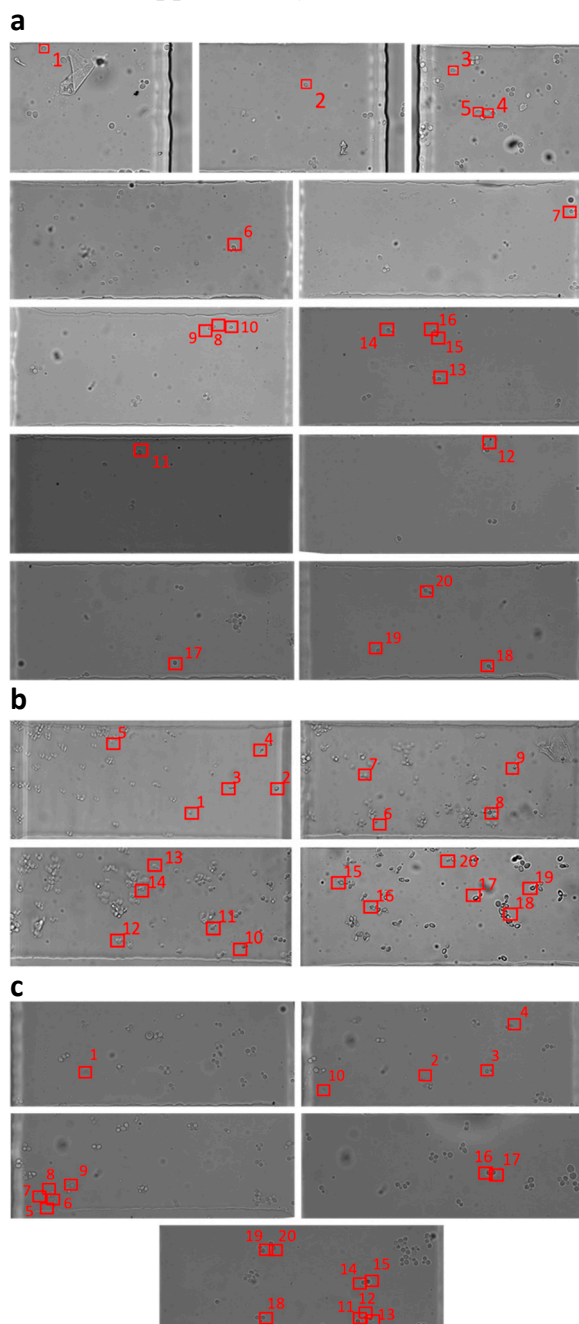

**Figure S1.** Location of the selected cells in the imaging chambers: **(a)** Amphotericin B treatment, **(b)** ethanol treatment, and **(c)** control experiment.

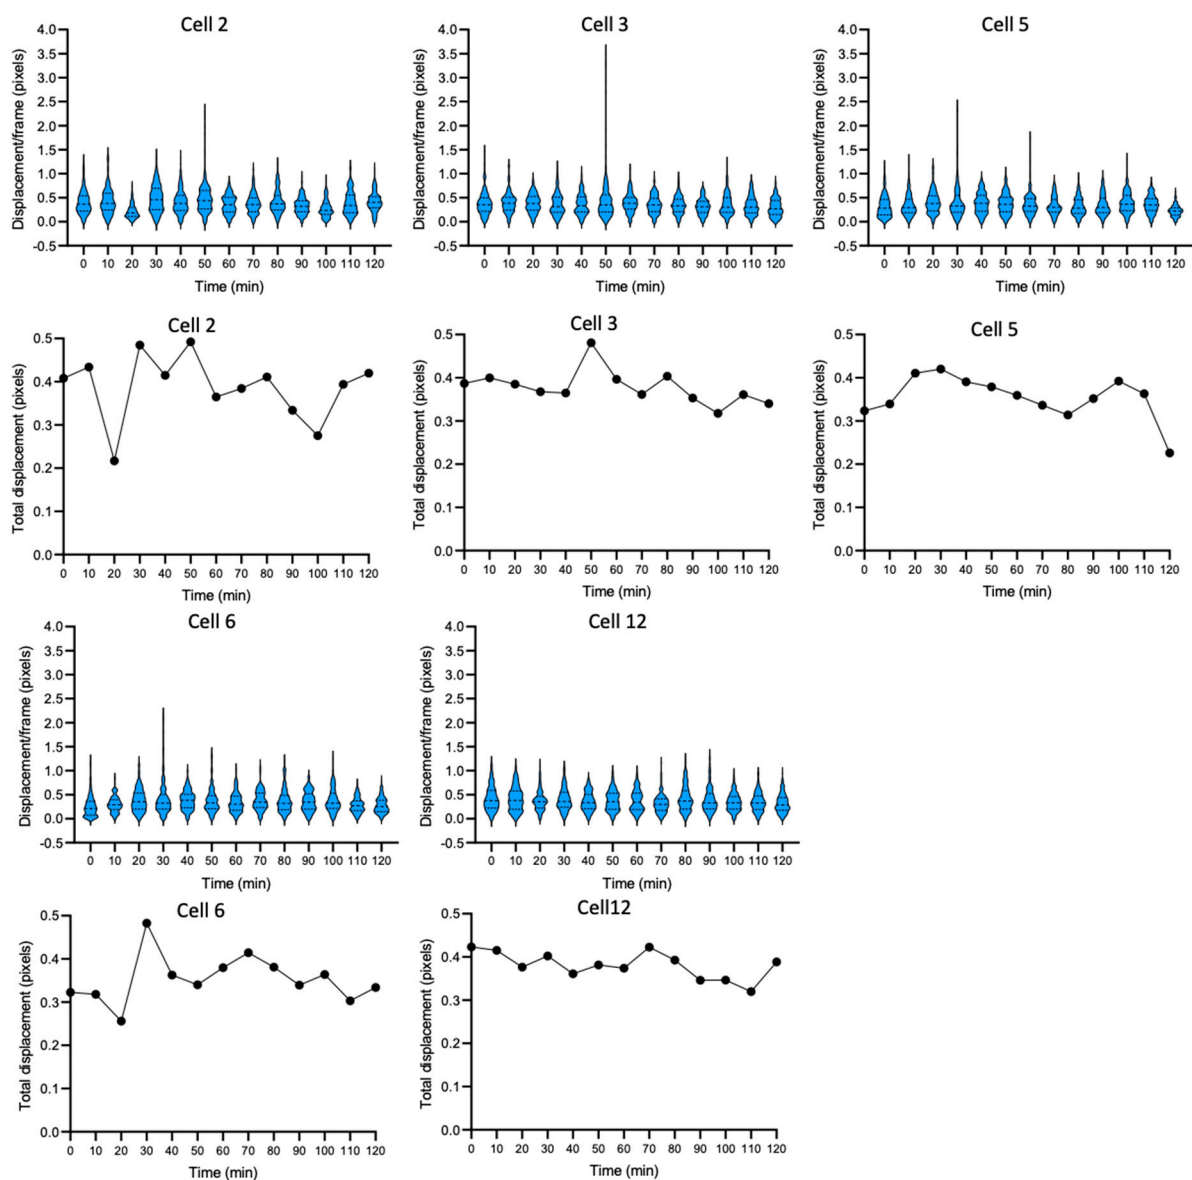

**Figure S2.** Cellular nanomotion of *S. cerevisiae* cells grown in YPD medium during 2 h. Distribution of the displacement/frame as a function of time for additional selected cells.

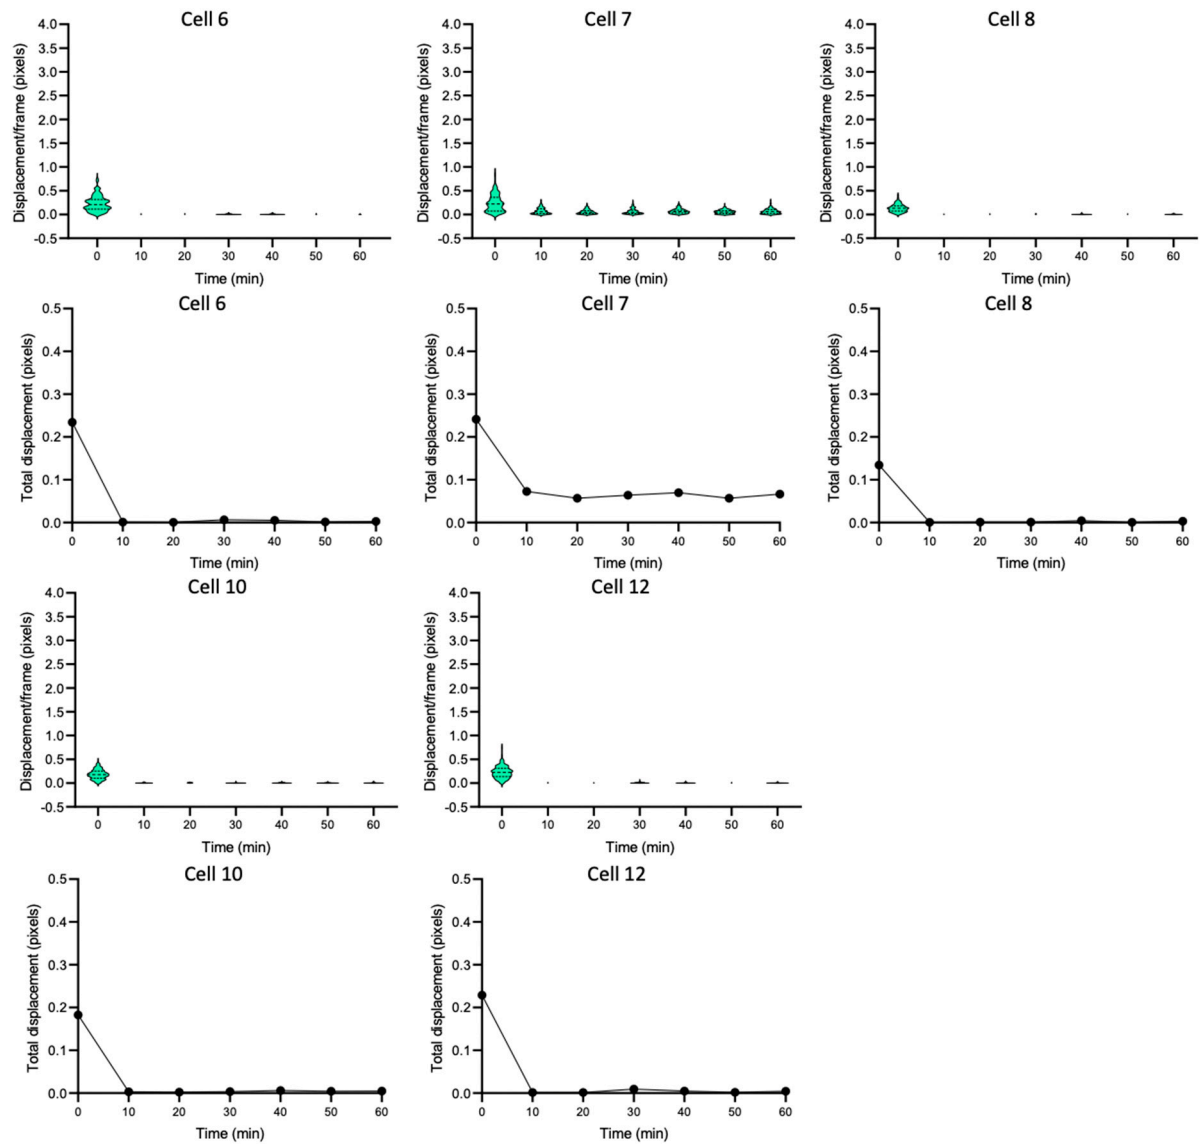

**Figure S3.** Effect of ethanol (70%) on the cellular nanomotion of *S. cerevisiae*. Distribution of the displacement/frame as a function of time for additional selected cells.

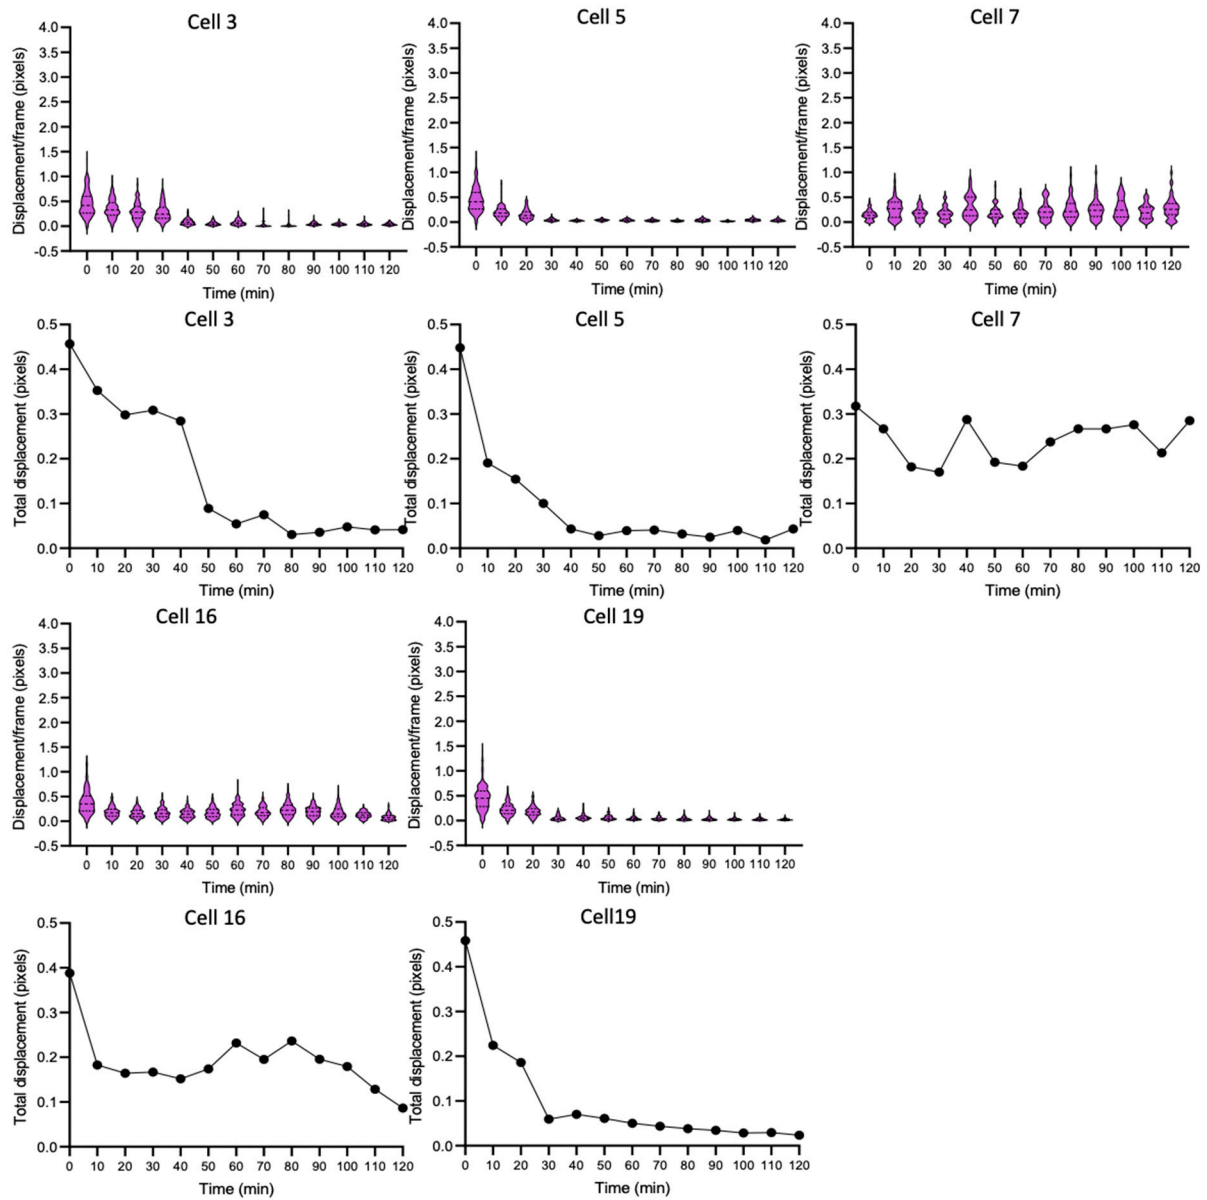

**Figure S4.** Effect of the antifungal amphotericin B (500  $\mu\text{g/ml}$ ) on the cellular nanomotion of *S. cerevisiae*. Distribution of the displacement/frame as a function of time for additional selected cells.
